# Supplementary material
Source: publisher site journal article supplement (https://www.dovepress.com/article/276380)

Supplementary Information

Kim et al

**Both Intracranial and Intravenous Administration of Functionalized Carbon Nanotubes Protect Dopaminergic Neuronal Death from 6-Hydroxydopamine**

Ok-Hyeon Kim1, Jun Hyung Park2, Jong In Son1, Kyung-Yong Kim1, and Hyun Jung Lee1,2,*

1Department of Anatomy and Cell Biology, College of Medicine, Chung-Ang University, Seoul, Republic of Korea.

2Department of Global Innovative Drug, Chung-Ang University, Seoul, Republic of Korea

**Supplementary Figure 1. Characterization of PEG-SWNTs.**

Simple cartoon and properties of PEG-SWNTs


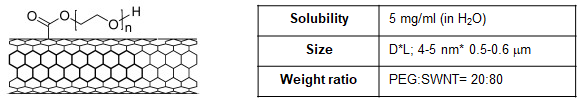


**Supplementary Figure 2. Effects of PEG-SWNTs on cell viability by 6-OHDA.**

SH-SY5Y cells were seeded in 96 well plate and indicated concentration of PEG-SWNTs were treated with 50 M of 6-OHDA at the same time (A) or 1 hour prior to 6-OHDA treatment (B). At 24 hours after 6-OHDA treatment, 10 l of AlamarBlue assay solution was added and fluorescent intensity was measured at excitation 530 nm and emission 590nm using a fluorescence plate reader. (C) Same concentration of PEG-SWNTs were added into cells without 6-OHDA for 24 hours. (n=3 independent experiments; One-way ANOVA, ###P<0.001, ####P<0.0001 Con vs 6-OHDA; *P<0.05, **P<0.01, ***P<0.001 6-OHDA vs 6-OHDA+PEG-SWNTs groups)


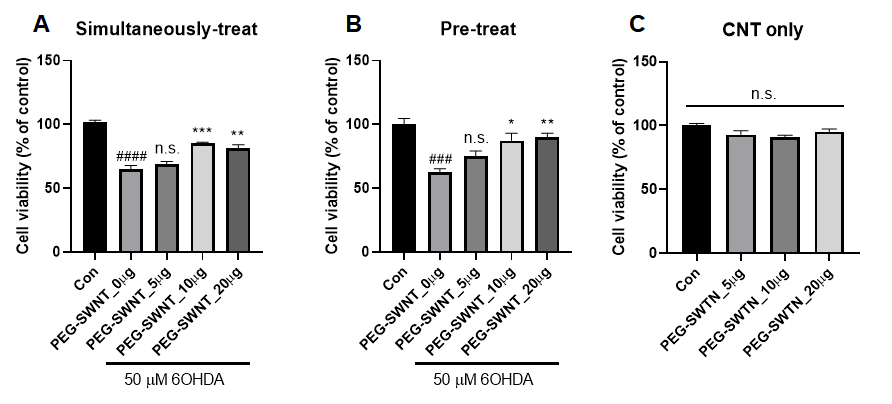


**Supplementary Figure 3. Change of body weight in each group.**

(A) and (B) show change of body weight in pre-intracranial injection of PEG-SWNT group compared to 6-OHDA group. (C) and (D) indicate body weight curve of post-intracranial injection of PEG-SWNT group compared to 6-OHDA group. (E) and (F) show body weight of post-intravenous injection of PEG-SWNTs group relative to 6-OHDA group. (A), (B), and (C) Body weight of each group was measured for 2 weeks. (D), (E), and (F) Body weight of each group was obtained for 180 days (6 months).


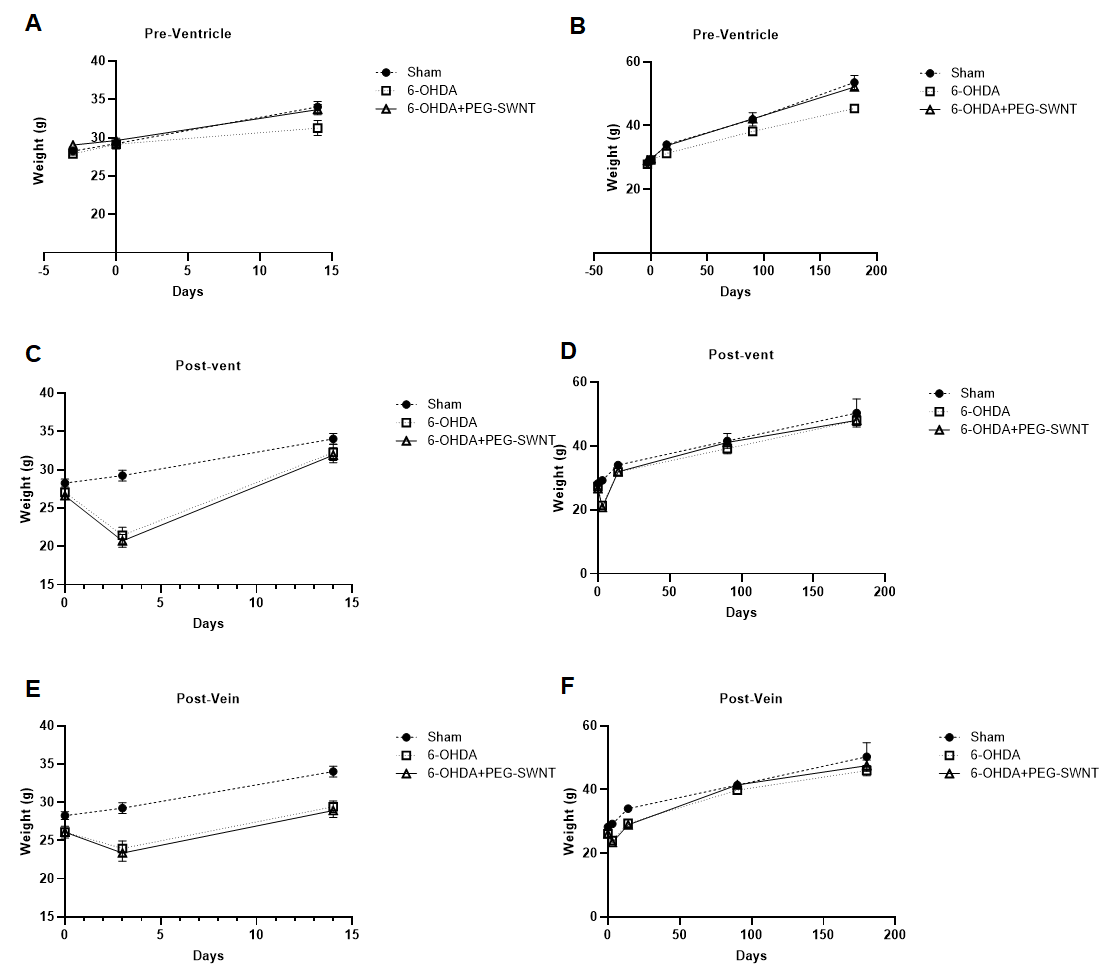


**Supplementary Figure 4. GOT and GPT monitored in intravenous injection of PEG-SWNT group.**

Blood GOT and GPT level were measured in intravenous injected mice with PEG-SWNT group at 2 weeks, 3 months and 6 months after PEG-SWNT injection. (n=5 per group, One-way ANOVA)


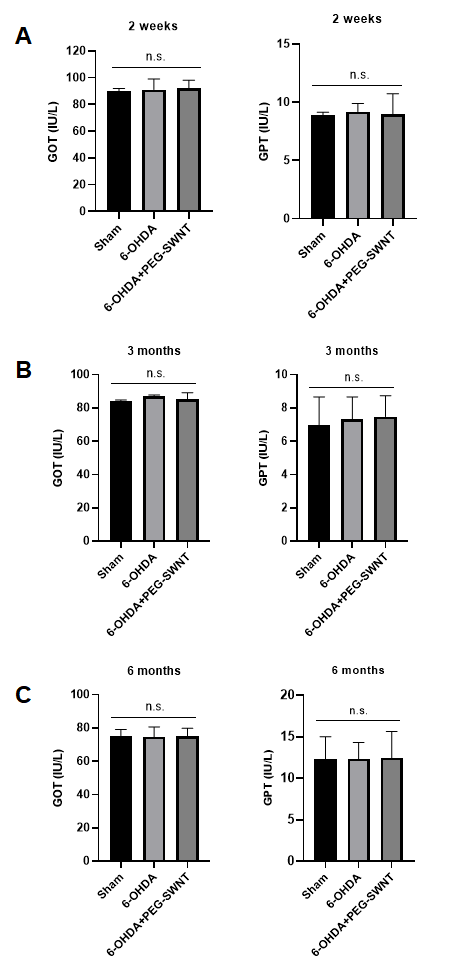

Supplement: Supplementary file 1 [file get_supplementary_file.php]
